# Supplementary material for: Methamphetamine functions as a novel CD4+ T-cell activator via the sigma-1 receptor to enhance HIV-1 infection
Source: PubMed Central journal article supplement (PMC6353873; doi:10.1038/s41598-018-35757-x), 2019-01-30
Supplement: 41598_2018_35757_MOESM1_ESM.pdf [file 41598_2018_35757_MOESM1_ESM.pdf]

# **Methamphetamine functions as a novel CD4<sup>+</sup> T-cell activator via the sigma-1 receptor to enhance HIV-1 infection**

Anil Prasad<sup>1¶</sup>, Rutuja Kulkarni<sup>1¶</sup>, Ashutosh Shrivastava<sup>1&#</sup>,  
Shuxian Jiang<sup>1&</sup>, Kaycie Lawson<sup>1</sup>, Jerome E. Groopman<sup>1\*</sup>

# Supplementary Figure S1

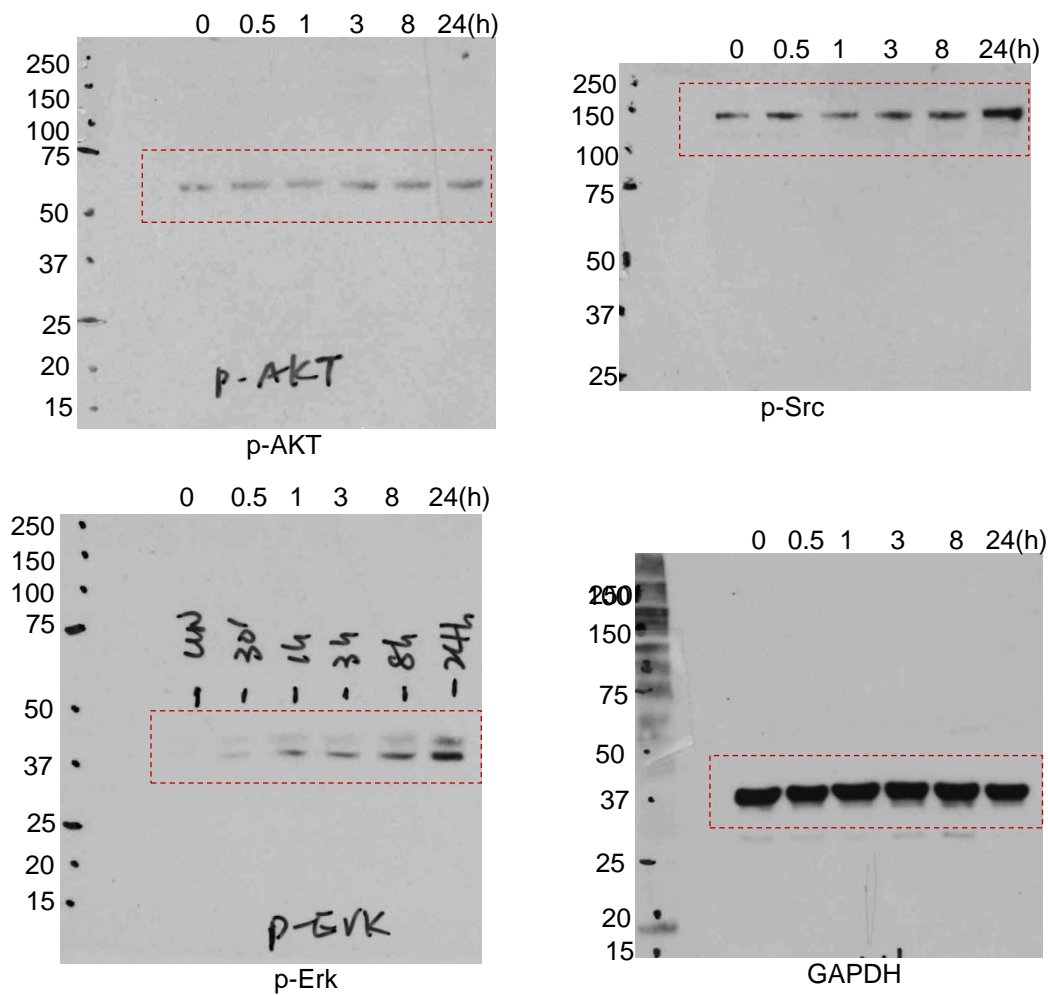

Fig. S1: Full-length blots for Figure 2D

## Supplementary Figure S2

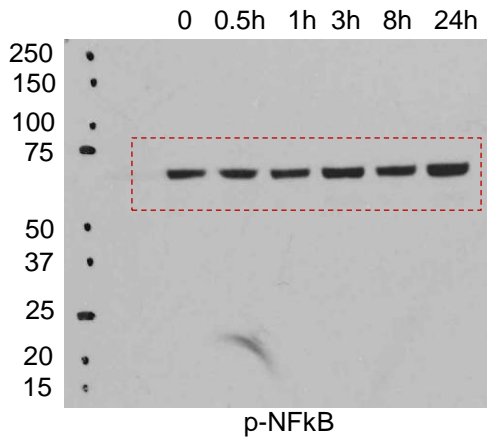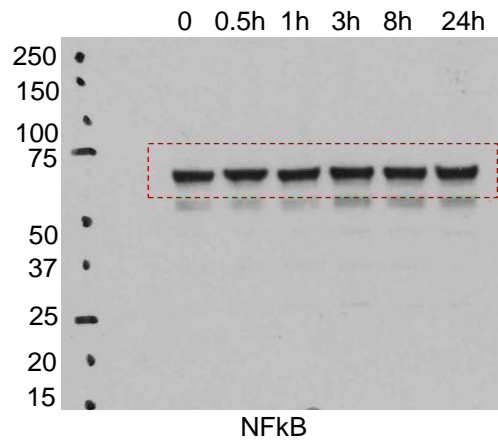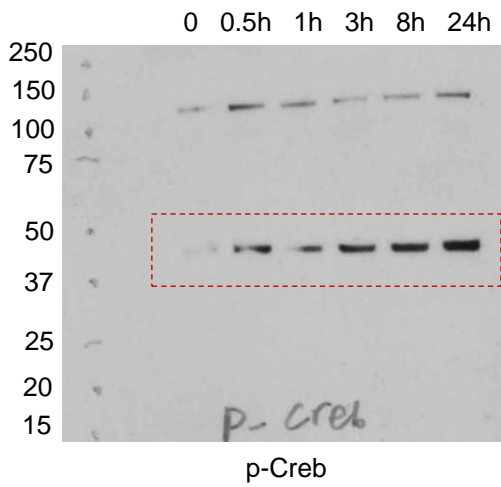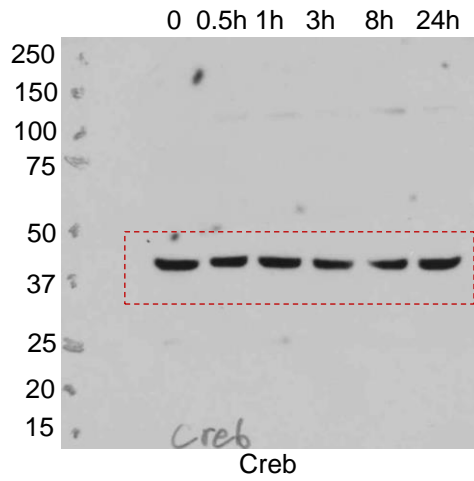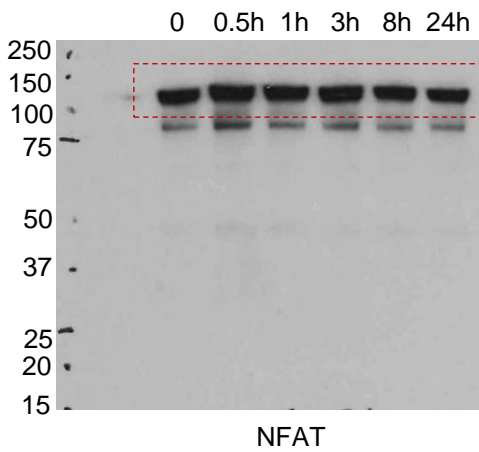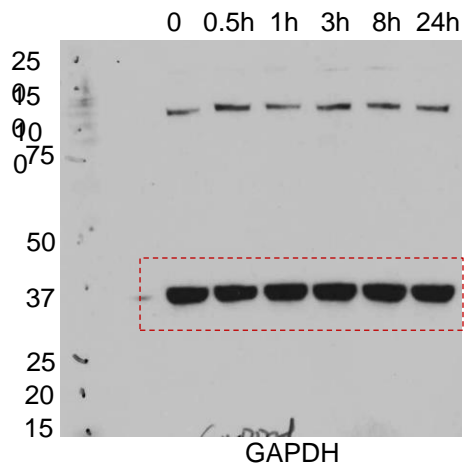

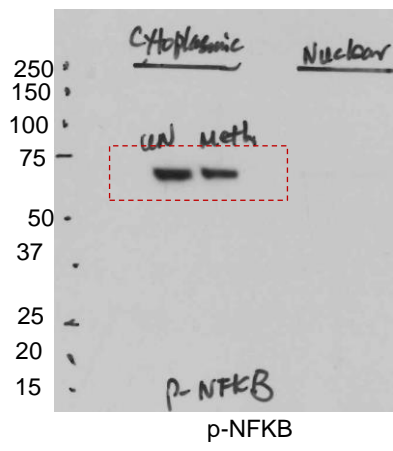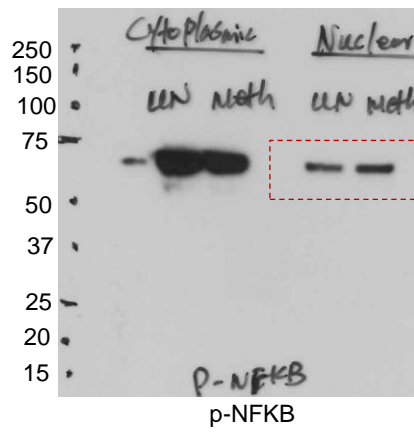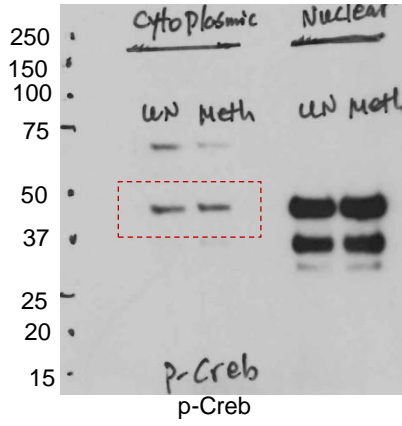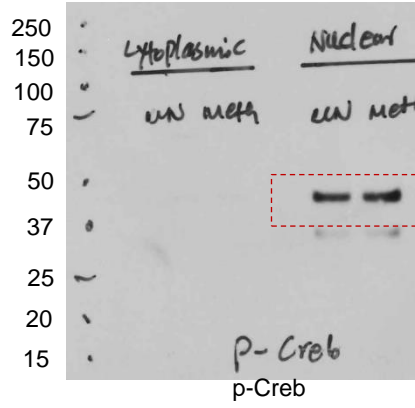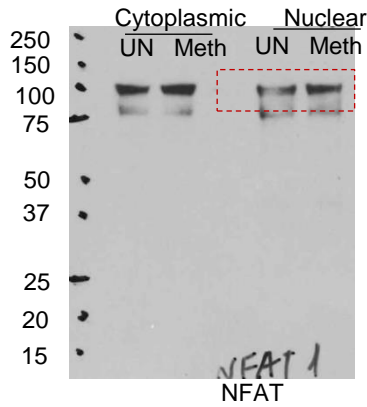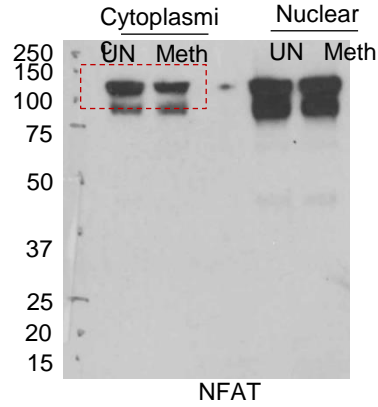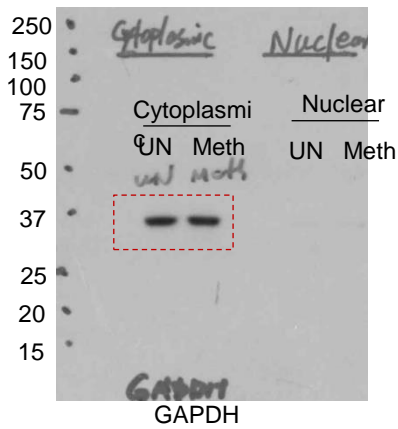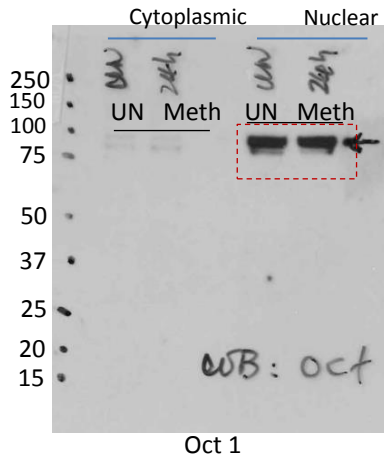

Fig. S2: Full-length blots for Figure 3A and B

### Supplementary Figure S3

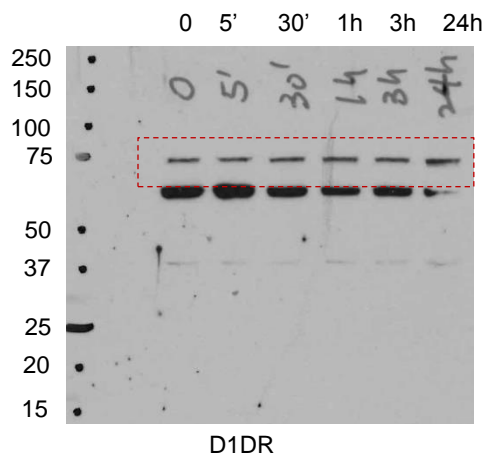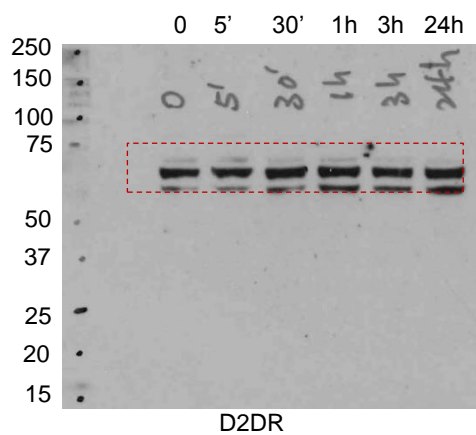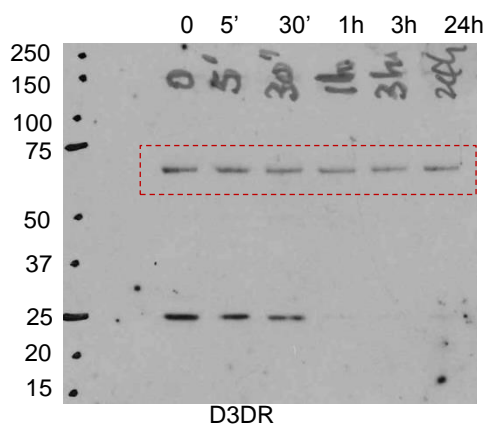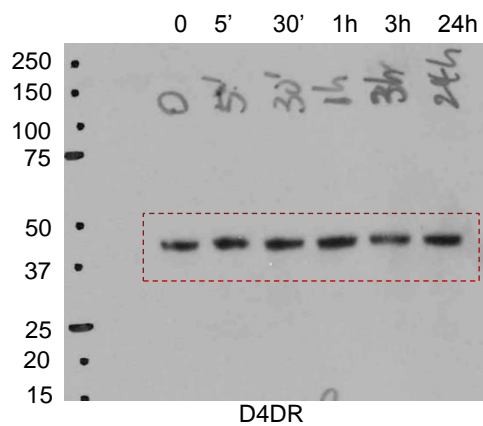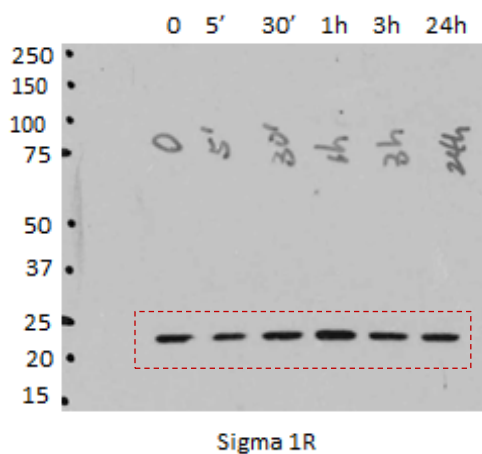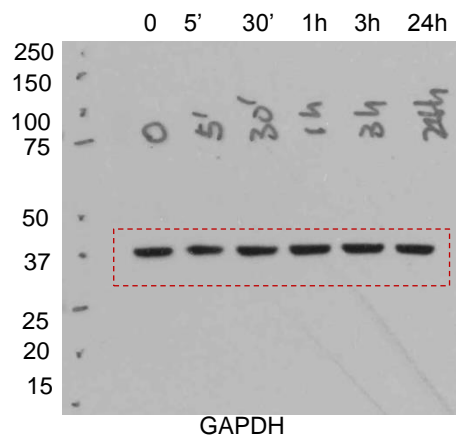

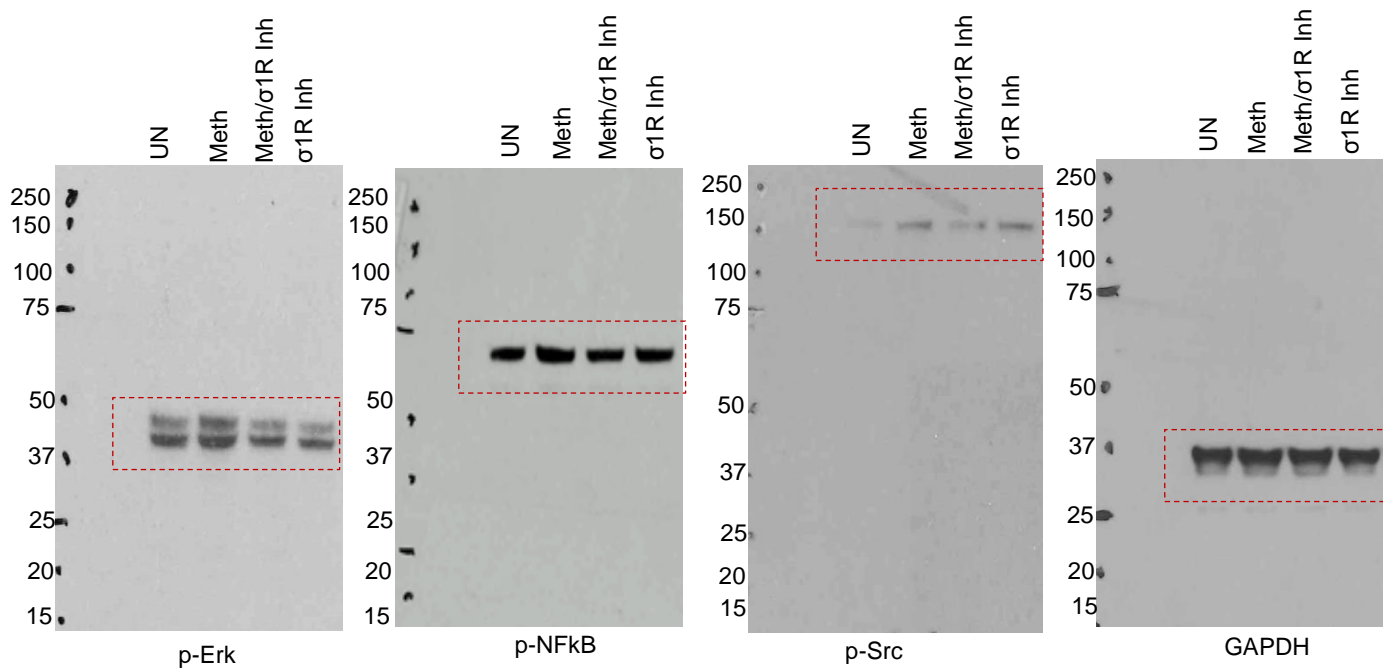

Fig. S3: Full-length blots for Figure 4 A and C

**Supplementary Figure S4**

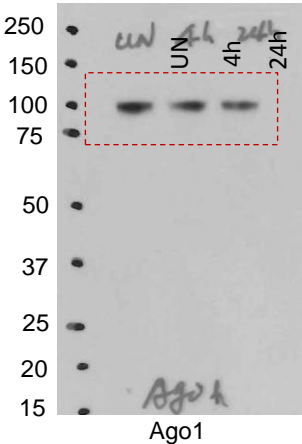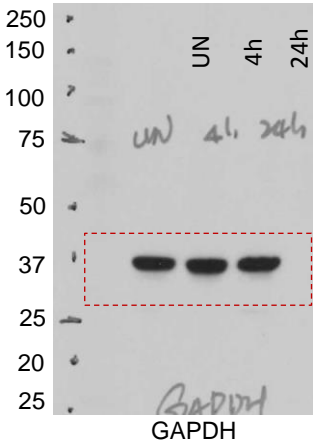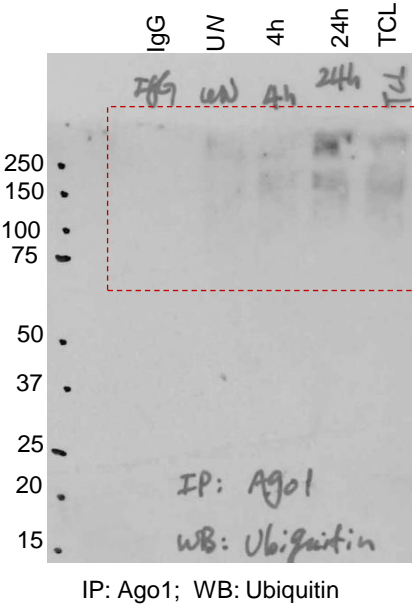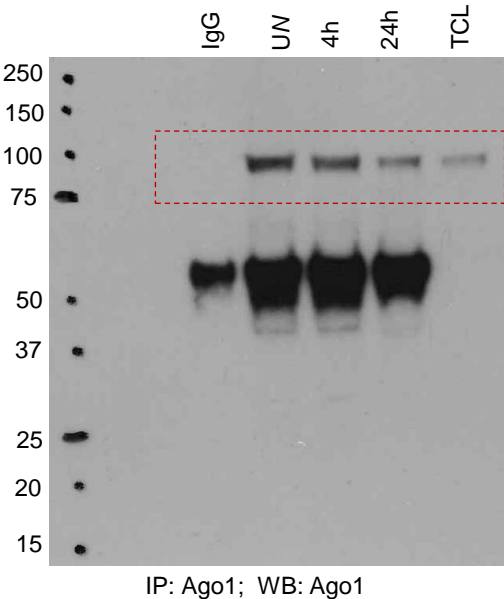

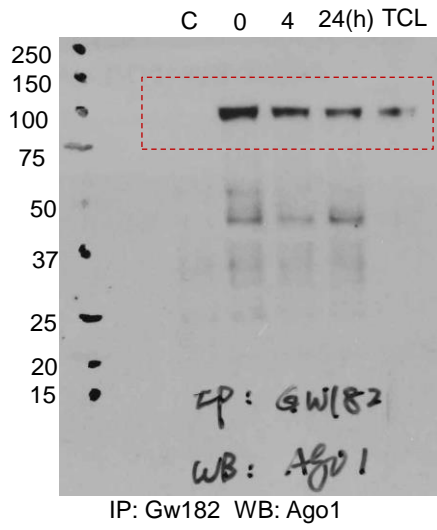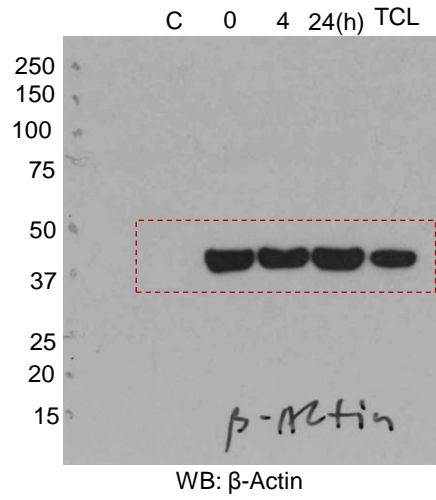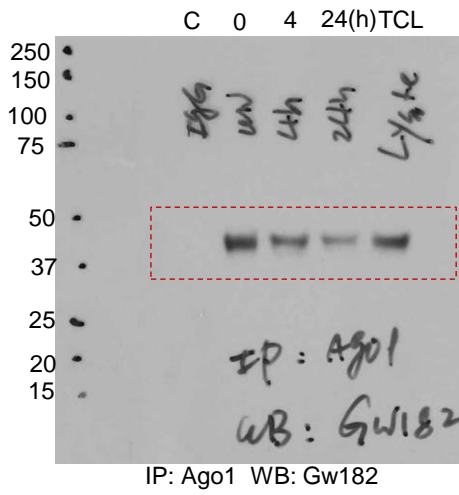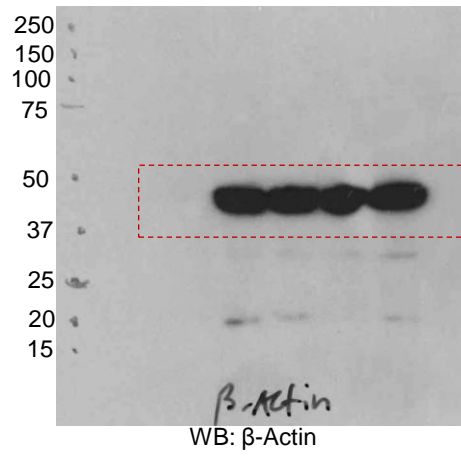

Fig. S4: Full-length blots for Figure 7A-C,
